# Supplementary material for: Longitudinal Tumor Size and Neutrophil‐to‐Lymphocyte Ratio Are Prognostic Biomarkers for Overall Survival in Patients With Advanced Non‐Small Cell Lung Cancer Treated With Durvalumab
Source: PubMed Central journal article supplement — CPT Pharmacometrics Syst Pharmacol. 2020 Dec 21;10(1):67–74. doi: 10.1002/psp4.12578 (PMC7825193; doi:10.1002/psp4.12578), 2020-12-21
Supplement: PSP4-10-67-s002.pdf [file PSP4-10-67-s002.pdf]

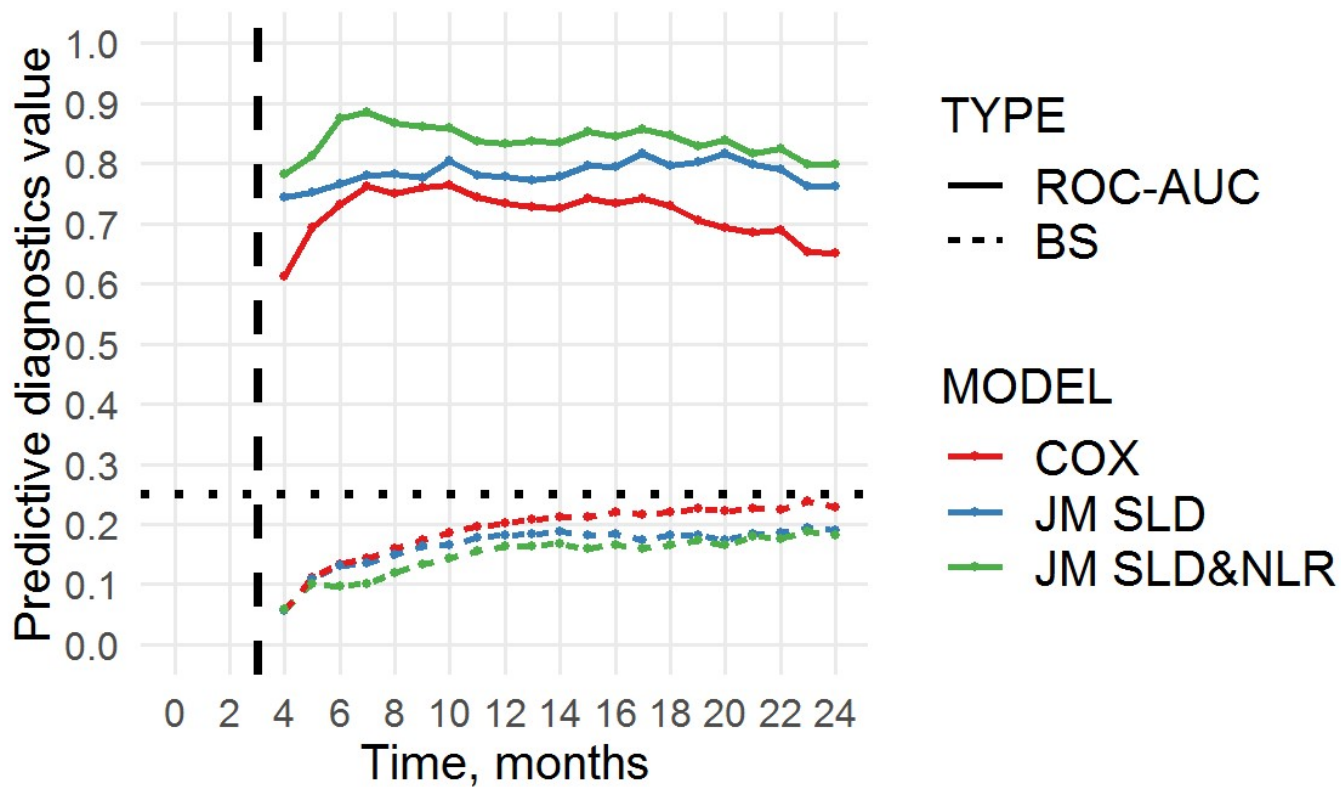

Figure S2. ROC-AUC (solid) and BS (dashed) obtained using a 3-month cut-off value for longitudinal data vs. time of prediction for the validation dataset
