# Supplementary material for: Longitudinal Tumor Size and Neutrophil‐to‐Lymphocyte Ratio Are Prognostic Biomarkers for Overall Survival in Patients With Advanced Non‐Small Cell Lung Cancer Treated With Durvalumab
Source: PubMed Central journal article supplement — CPT Pharmacometrics Syst Pharmacol. 2020 Dec 21;10(1):67–74. doi: 10.1002/psp4.12578 (PMC7825193; doi:10.1002/psp4.12578), 2020-12-21
Supplement: PSP4-10-67-s003.pdf [file PSP4-10-67-s003.pdf]

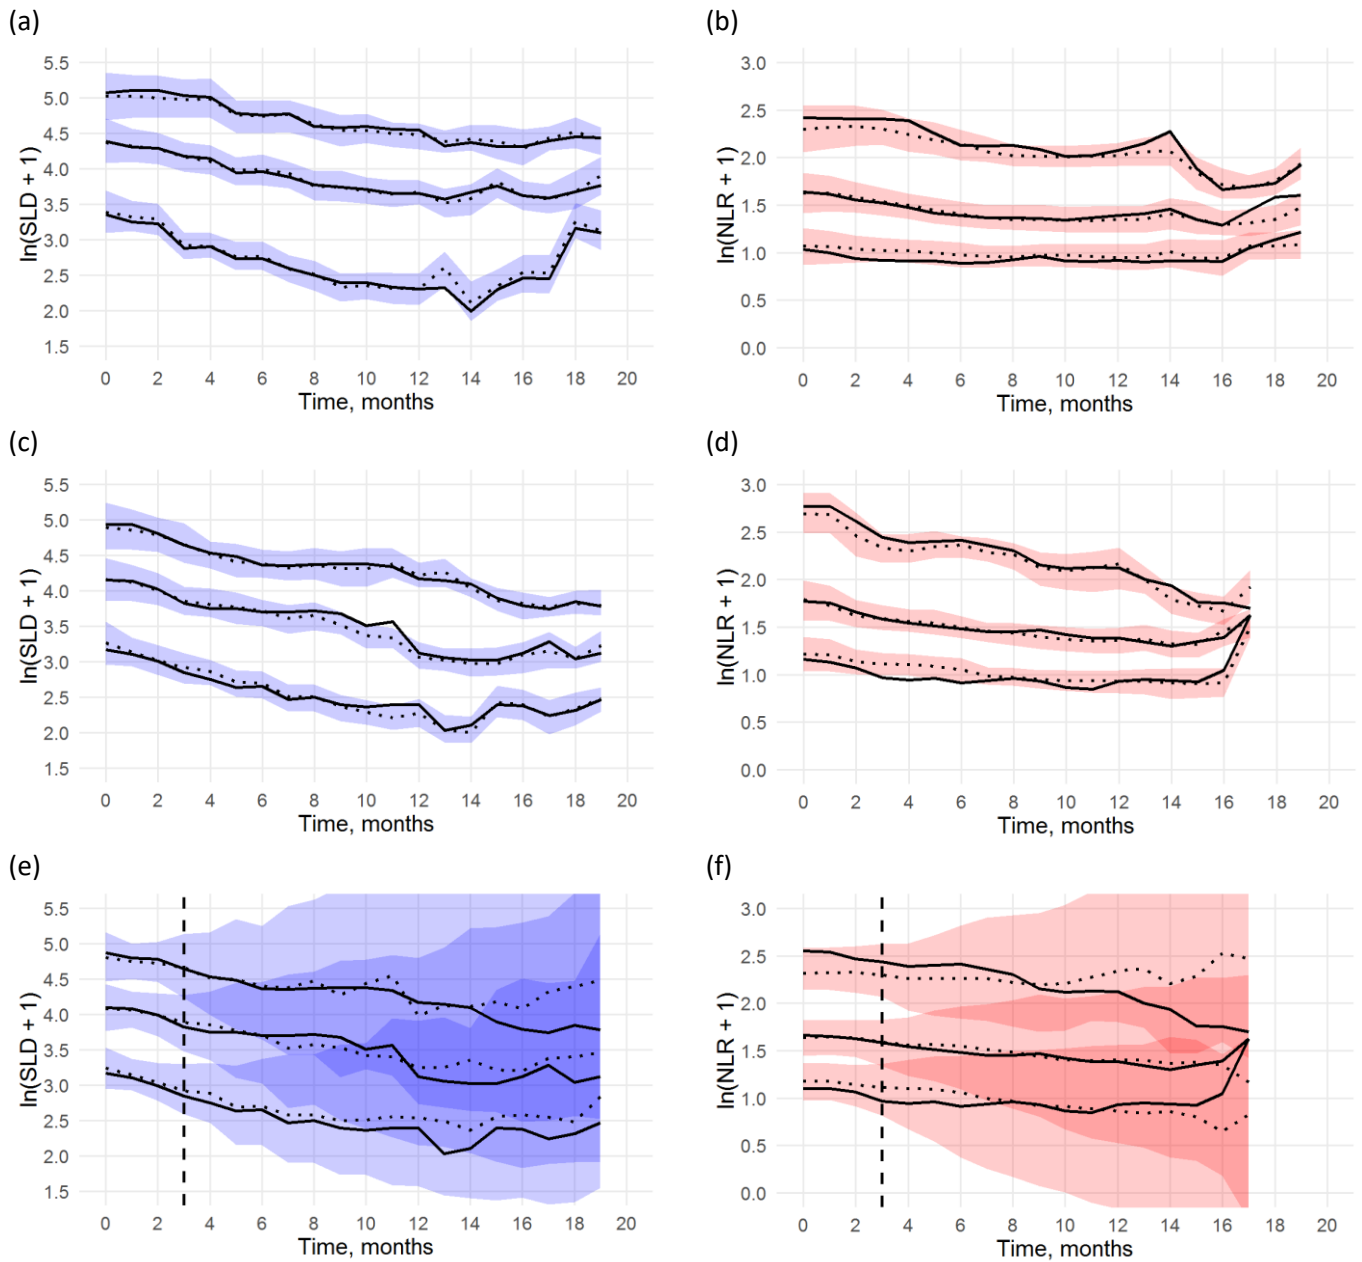

Figure S3. a) and b): VPC diagnostics for the longitudinal data (training dataset). c) and d): VPC diagnostics estimated on the validation dataset. e) and f): Model predictions of longitudinal profiles, based on limited data (3 months of longitudinal data). Solid lines: Median, actual, with 90% and 10% quantiles of longitudinal data. Dotted lines: Predicted values; range in color: 95% CI of predictions.
